# Supplementary material for: TBC1D25 Regulates Cardiac Remodeling Through TAK1 Signaling Pathway
Source: PubMed Central journal article supplement (PMC7085222; doi:10.7150/ijbs.41130), 2020-02-21
Supplement: ijbsv16p1335s1.pdf [file ijbsv16p1335s1.pdf]

## **TBC1D25 Regulates Cardiac Remodeling Through TAK1 Signaling Pathway**

Sen Guo<sup>1\*</sup>, Yuan Liu<sup>1\*</sup>, Lu Gao<sup>1\*</sup>, Fankai Xiao<sup>2</sup>, Jihong Shen<sup>3</sup>, Shiyong Xing<sup>4</sup>, Fan Yang<sup>1</sup>, Wencai Zhang<sup>1</sup>, Qiangwei Shi<sup>1</sup>, Yan Li<sup>1#</sup>, Luosha Zhao<sup>1#</sup>

<sup>1</sup> Department of Cardiology, The First Affiliated Hospital of Zhengzhou University, No.1 Jianshe East Road, Zhengzhou, China

<sup>2</sup> Henan Key Laboratory for Esophageal Cancer Research, the First Affiliated Hospital of Zhengzhou University

<sup>3</sup> Department of Electrocardiogram, The Second Affiliated Hospital of Zhengzhou University, No.2 Jingba Road, Zhengzhou, China

<sup>4</sup> Department of Cardiology, The First Affiliated Hospital, and College of Clinical Medicine of Henan University of Science and Technology, Luoyang, China.

\* These authors contributed equally to this work.

# **Corresponding authors at:** Luosha Zhao, Tel: 86-0371-67967622; Fax: 86-0371-67967626; E-mail: zlszzu@126.com; Yan Li, Tel: 86-0371-66271072; Fax: 86-0371-66271073; E-mail: [sophialiyang1987@126.com](mailto:sophialiyang1987@126.com).

Supplementary table 1. The primer pairs used in this study

| Gene name           | Forward primer (mouse) | Reverse primer (mouse)   |
|---------------------|------------------------|--------------------------|
| ANP                 | TCGGAGCCTACGAAGATCCA   | TTCGGTACCGGAAGCTGTTG     |
| BNP                 | GAAGGACCAAGGCCTCACAA   | TTCAGTGC GTTACAGCCCAA    |
| MYH7                | CAACCTGTCCAAGTTCCGCA   | TACTCCTCATTCAGGCCCTTG    |
| Collagen I $\alpha$ | TGCTAACGTGGTTCGTGACCGT | ACATCTTGAGGTCGCGGCATGT   |
| Collagen III        | ACGTAAGCACTGGTGGACAG   | CCGGCTGGAAAGAAGTCTGA     |
| CTGF                | TGACCCCTGCGACCCACA     | TACACCGACCCACCGAAGACACAG |
| GAPDH               | ACTCCA CTACGGCAAATTC   | TCTCCATGGTGGTGAAGACA     |

Supplementary table 2. The antibodies used in this study

| Anibody | Manufacturer | Catalogue number | Source of species | Dilution |
|---------|--------------|------------------|-------------------|----------|
| TBC1D25 | Boster       | A11691           | rabbit            | 1:500    |
| ANP     | Abclonal     | A1609            | rabbit            | 1:1000   |
| p-TAK1  | CST          | 4531             | rabbit            | 1:1000   |
| TAK1    | CST          | 5206             | rabbit            | 1:1000   |
| p-ERK   | CST          | 4370             | rabbit            | 1:1000   |
| ERK     | CST          | 4695             | rabbit            | 1:1000   |
| P-JNK   | CST          | 4668             | rabbit            | 1:1000   |
| JNK     | CST          | 9252             | rabbit            | 1:1000   |
| p-p38   | CST          | 4511             | rabbit            | 1:1000   |
| p38     | CST          | 9212             | rabbit            | 1:1000   |
| p-p65   | CST          | 3033             | rabbit            | 1:1000   |
| p65     | CST          | 8242             | rabbit            | 1:1000   |
| Flag    | MBL          | M185             | mouse             | 1:2000   |
| HA      | MBL          | M180-3           | mouse             | 1:2000   |
| GAPDH   | CST          | 2118             | rabbit            | 1:5000   |
